# Supplementary material
Source: HighWire-hosted journal article supplement (https://cmajopen.ca/highwire/filestream/81109/field_highwire_adjunct_files/1/2018-0043_original_submission.pdf)
Supplement: 2018-0043_original_submission.pdf [file 2018-0043_original_submission.pdf]

**Title page:**

**Title:** Children referred for Tuberculosis medical surveillance (TBMS) in Ontario, Canada: results of clinical and diagnostic evaluation

**Authors:** Catherine Yang<sup>a</sup>, Abdool S. Yasseen III<sup>b,c</sup>, Jennifer Stimec<sup>d</sup>, Elizabeth Rae<sup>b,d</sup>, Valerie Waters<sup>e,f</sup>, Ray Lam<sup>e,f</sup>, \*Shaun K. Morris<sup>f,g</sup>, \*Ian Kitai<sup>f,g</sup>

**Authors affiliations:**

- a. Faculty of Medicine, University of Toronto, Toronto, Ontario
- b. Dalla Lana School of Public Health, University of Toronto, Toronto, Ontario
- c. Children's Hospital of Eastern Ontario Research Institute, Ottawa, Ontario
- d. Department of Diagnostic Imaging, Hospital for Sick Children, Toronto, Ontario
- e. Toronto Public Health, Toronto, Ontario
- f. Faculty of Nursing, University of Toronto, Toronto, Ontario
- g. Division of Infectious Diseases, Hospital for Sick Children, Toronto, Ontario
- h. Department of Pediatrics, University of Toronto, Toronto, Ontario

\*Contributed equally

**Corresponding author:**

Ian Kitai, Hospital for Sick Children, 555 University Avenue Toronto, Ontario, M5G 1X8, Canada

Phone: 416-812 7654 x 201985, Fax: 416-813 5032, Email: [ian.kitai@sickkids.ca](mailto:ian.kitai@sickkids.ca)

**The authors have no competing interests to declare.**

Supported by a grant from Paediatric Consultants, Hospital for Sick Children, Toronto.

1  
2  
3 **30 Abstract**

4  
5 **31 BACKGROUND:**

6  
7  
8 **32** There are few data about the utility of the Canadian TB Medical Surveillance (TBMS) system  
9  
10 **33** for detecting tuberculosis (TB) in children and adolescents.  
11

12 **34**  
13  
14 **35 OBJECTIVE:**

15  
16  
17 **36** To assess the prevalence of TB infection and disease in TBMS-referred patients evaluated at  
18  
19 **37** the SickKids TB Program.  
20

21 **38**  
22  
23 **39 DESIGN/METHODS:**

24  
25  
26 **40** We retrospectively studied clinical records, radiographic findings and results of interferon  
27  
28 **41** gamma release assays (IGRAs) of all TBMS-referred children evaluated at SickKids between  
29  
30 **42** November 2012 and June 2016.  
31

32 **43**  
33  
34 **44 RESULTS:**

35  
36  
37 **45** The median age of the 216 children, 40% of all Ontario pediatric TBMS referrals, was 10.0  
38  
39 **46** years. Most were born in the Philippines (73%), and India (19%). Seventy-seven percent had a  
40  
41 **47** history of prior treatment for TB and 16% were federal-sponsored refugees from high-TB-burden  
42  
43 **48** settings. Negative IGRAs were found in 110/130 (85%) of those with prior TB treatment.  
44  
45 **49** Thirty-one patients (14%) had any radiographic abnormality of whom 4 had changes thought to  
46  
47 **50** be due to TB. No children were diagnosed with active TB at assessment or during follow up; 3  
48  
49 **51** were treated for latent TB infection following IGRA testing at SickKids. A positive IGRA was  
50  
51 **52** associated with contact with infectious TB (OR 5.97 [95% CI 2.03, 17.52]) and older age at first  
52  
53  
54  
55  
56  
57  
58  
59  
60

1  
2  
3 53 clinic visit (OR 2.98 [95% CI 1.24, 8.30]), but not with radiographic abnormalities or history of  
4  
5 54 prior TB treatment.  
6  
7

8 55

9  
10 56 INTERPRETATION:

11  
12 57 Most children were referred because of prior treatment for TB: few had evidence of infection or  
13  
14 58 prior disease. The TBMS process did not identify any children who required treatment for active  
15  
16 59 disease and requires improvement.  
17  
18

19 60

20  
21 61

22  
23  
24 62

Confidential

## 63 Introduction

64  
65 Pediatric tuberculosis (TB) in Canada predominantly affects migrant children, children of  
66 migrant parents, and indigenous children.<sup>1</sup> During the years 2006-2011, 33.7% of migrants to  
67 Canada were younger than 25.<sup>2</sup> Requirements for screening children and adolescents for TB  
68 vary widely between immigrant-receiving-low-TB burden countries.<sup>3</sup> In Canada, all prospective  
69 applicants for residency undergo an Immigration Medical Exam (IME), which includes a  
70 medical history for all migrants and chest X-rays for those older than 11 years of age, but does  
71 not include routine Tuberculin Skin Tests (TSTs) or IGRAs.<sup>4</sup> Those deemed to be at high risk for  
72 reactivated or new incident TB are referred by Immigration, Refugees, and Citizenship Canada  
73 for post-landing TB-medical-surveillance (TBMS).

74 Using cohort data from Ontario, Canada, Khan et al. have shown that for adults, current  
75 TBMS screening is inefficient, identifying few cases of TB.<sup>5</sup> Adults are often referred for  
76 TBMS because of abnormal chest radiographs; but chest radiographs are not required for  
77 younger children. Recently, Yasseen et al. have shown that referral for TBMS in children and  
78 adolescents was closely correlated with a past diagnosis of TB, and that the proportion of those  
79 with a prior TB diagnosis was significantly different between countries with comparable TB  
80 incidence rates.<sup>6</sup> It is unclear whether this reflected inaccurate diagnosis in some countries,  
81 underdiagnosis in others, or a combination.

82 Referral for TBMS incurs financial and other costs for families. Being flagged with TB  
83 concerns is often associated with fear of stigmatization and erroneously, fear of loss of  
84 immigration status.<sup>7</sup>

85 The TB clinic at the Hospital for Sick Children (SickKids) is the principal facility used  
86 by Toronto Public Health (TPH) to evaluate children notified to them for TBMS. The clinic

1  
2  
3 87 receives 40-80 TBMS referrals per year. Standardized demographic and clinical information is  
4  
5 88 collected at clinic entry. We examined records of a cohort of such children to ascertain reasons  
6  
7 89 for TBMS referral, the proportion of children who had evidence of TB infection or prior disease,  
8  
9 90 and to assess the utility of the TBMS process in detecting TB in children and adolescents.  
10  
11  
12  
13  
14  
15  
16  
17  
18  
19  
20  
21  
22  
23  
24  
25  
26  
27  
28  
29  
30  
31  
32  
33  
34  
35  
36  
37  
38  
39  
40  
41  
42  
43  
44  
45  
46  
47  
48  
49  
50  
51  
52  
53  
54  
55  
56  
57  
58  
59  
60

91

Confidential

## 92 **Materials and Methods**

93 We retrospectively analysed data from all children <18 years of age referred to the  
94 SickKids' TB clinic for TBMS between November 29<sup>th</sup>, 2012 and June 9<sup>th</sup>, 2016, a sample for  
95 whom we had consistent records. Data was obtained from a standardized initial clinic visit  
96 assessment form, which records demographic and other data, as well as clinic letters, IME  
97 records (if available) and chest radiograph reports. We excluded children referred to our clinic  
98 who had not been identified by the TBMS system.

99 Chest radiographs were performed at SickKids for all patients at the first clinic visit and  
100 reported by pediatric radiologists. Radiographs in which any abnormalities were described were  
101 reviewed by a study pediatric radiologist (who was blinded to IGRA results) according to  
102 standardized clinical case definitions for classification of intrathoracic TB disease.<sup>8</sup>

103 Follow up visits were scheduled at the discretion of the evaluating clinician.

104 Depending on availability and as part of clinical evaluation the QuantiFERON-TB Gold  
105 (QFT) test, an IGRA, obtained in the majority of children, especially after 2015. Demographic  
106 variables were presented as frequencies and proportions, and univariate analysis followed by  
107 multiple logistic regression were used to identify risk factors for TB infection. All analyses were  
108 conducted using the SAS software (Version 9.4). This study was approved by the research ethics  
109 board at SickKids (REB #1000053061).

110

111

**112 Results****113 Patient characteristics**

114 We included all 216 study-eligible children referred for TBMS at SickKids. Overall, 118  
115 (55%) were male. The median age at time of first clinic visit was 10.0 years (Table 1). Children  
116 born in the Philippines, 157 (73%), and India, 39 (18%), accounted for 91% of referrals. Of the  
117 39 migrant children born in India, 37 (93%) were federally sponsored refugees of Tibetan  
118 descent. The nine children born in Israel, Saudi Arabia, Italy and Lebanon, had migrated to the  
119 Phillipines prior to migration to Canada. Ninety six percent of patients were recorded as having  
120 received the Bacillus Calmette-Guérin (BCG) vaccine. Table 2 shows the numbers of migrant  
121 children referred for TBMS in Ontario (aggregate data from Public Health Ontario) and the  
122 proportion seen at the SickKids TB Clinic. The overall ages were younger than that for Ontario  
123 in keeping with Toronto Public Health's policy of preferentially referring younger children to  
124 SickKids as evaluation for TB at this age is more difficult.

125 The most common reasons for referral for TBMS included: past history of prior treatment  
126 for TB [166 children (77%)] and referral under a refugee resettlement program involving high-  
127 TB-risk communities [34 children (16%)]. Overall, 166 (77%) migrant children had a prior  
128 diagnosis of TB made in the country of migration: of these 150 (90%) were diagnosed with  
129 “Primary Complex TB” in the Philippines. In 102/166 (61%) instances the mother or both  
130 parents had immigrated to Canada before the child’s arrival: parents were often unsure of details  
131 of symptoms prior to treatment. Based on IME reports and recorded history, 78 (47%) were  
132 asymptomatic prior to diagnosis, another 80 (48%) had symptoms of cough, 36 (22%) fever 21  
133 (13%) weight loss or poor appetite and 9 (5%) lymphadenopathy.

1  
2  
3 134 Investigations prior to immigration  
4

5 135 There was some indication of chest radiographic findings at the time of TB diagnosis in 138 TB-  
6  
7 136 treated patients (Appendix 1): in 67 patients with recorded findings at the time of TB treatment  
8  
9 137 the descriptions were “abnormal” (57%), “primary complex or Kochs” (9%) and normal (16%);  
10  
11 138 12 patients (18%) were noted to have hilar changes. During the last 3 months of the study  
12  
13 139 period, 27 radiographs taken in the country of origin were reported by SickKids radiologists: of  
14  
15 140 these 4 (15%) were described as poor quality, 12 (44%) as normal, 7 (26%) as nonspecific lower  
16  
17 141 airway inflammation or peribronchial thickening; 1 had intrathoracic lymphadenopathy  
18  
19 142 suggestive of TB (Appendix 2). Seventy nine (37%) children had a TST performed: 38 with a  
20  
21 143 quantified measurement recorded, ( $\geq 10$ mm in 31 and  $< 10$ mm in 7); and 41 where the TST was  
22  
23 144 reported to be ‘positive’ (33) or ‘negative’ (8). No children had gastric aspirates prior to  
24  
25 145 immigration. Twenty-six (12%) had expectorated sputum: 85% were smear- and culture-  
26  
27 146 negative, 4% smear-negative culture-positive and 11% had an unknown result. In the 7 children  
28  
29 147 (3%) who had sputum induction, results were all smear and culture-negative. Other  
30  
31 148 investigations included: computed tomography scans (0.9%), lymph-node fine-needle-aspiration  
32  
33 149 (0.4%) and a mycobacterial urine culture (0.4%).  
34  
35  
36  
37  
38  
39

40 150 Of the 166 children who had TB/LTBI treatment prior to immigration, the median age at  
41  
42 151 initiation of treatment was 3.0 years. From IME records, 111(51%) children received triple  
43  
44 152 drug therapy with Rifampicin, (R) Isoniazid (I) and Pyrazinamide (Z). Three children (1%)  
45  
46 153 received therapy with RHZ and Ethambutol. Records suggest 16 children (7%) received RH, 1  
47  
48 154 child (0.5%) RZ, and 6 children (3%) Isoniazid monotherapy.  
49  
50

51 155

52  
53  
54 156 Investigations and management at SickKids  
55  
56  
57  
58  
59  
60



1  
2  
3 157 All children underwent chest radiographs at their first SickKids clinic visit, of these, 165  
4  
5 158 (76%) were reported as normal. The fifty-three radiographs which were noted to have possible  
6  
7 159 abnormalities or quality issues were subjected to a review by a study pediatric radiologist (Table  
8  
9  
10 160 4). Twenty-two (42%) of the study-reviewed-radiographs were deemed normal: none of these  
11  
12 161 children had positive IGRAs. Twenty seven (12.5%) had questionable abnormalities, and 4  
13  
14 162 children had abnormalities according to a structured classification<sup>8</sup>: a 12 year old with an  
15  
16 163 enlarged intrathoracic lymph node, an 11 year old with upper lobe lucencies, a 13year old with a  
17  
18 164 possible granuloma, and an 8 year old with hilar changes.

19  
20  
21 165 In total, 176 (82%) children had an IGRA (60% of children before and 92% of children  
22  
23 166 after 2015) of which 24 (14%), 152 (86%), and 0 had positive, negative, and indeterminate result  
24  
25 167 respectively. Negative IGRAs were found in 110/130 (85%) of those with a history of prior  
26  
27 168 treatment for TB disease or infection. Twenty-nine children (13%) had a TST performed in  
28  
29 169 Canada, of these, 6 (21%) had induration >10mm: all 6 had a history of BCG vaccination. Three  
30  
31 170 children (1%) had expectorated sputum collected in clinic, all were smear and culture negative.  
32  
33 171 Three children (1%), all federally sponsored refugees without prior TB treatment, had positive  
34  
35 172 QFTs and were treated for latent TB infection (LTBI). No children were diagnosed with, or  
36  
37 173 treated for active TB at or following their SickKids assessment.

38  
39  
40 174 Of the the 114 patients first seen in the first 30 months of the study period, 95 (81%) had at least  
41  
42 175 one follow-up clinic evaluation and chest radiograph after a median interval of 3.5 months  
43  
44 176 from first visit and 69 (61%) had a second evaluation. Of those seen in the first 36 months  
45  
46 177 138/173 (80%) had at least one follow-up evaluation. For those 73 children (34%) officially  
47  
48 178 discharged, the mean length of follow-up was 10 (10.3) months No children were diagnosed with  
49  
50 179 new TB infection or disease during the follow-up period.  
51  
52  
53  
54  
55  
56  
57  
58  
59  
60

180

181 Predictors of a positive IGRA

182 On univariate analyses (Table 3), only contact with an infectious source case of TB and  
183 age at treatment (<4, 5-16 yrs) were significantly associated with a positive IGRA. On  
184 multivariate logistic regression (Table 3), older age at first clinic visit as a continuous variable  
185 (OR 2.98 [95% CI 1.24, 8.30]) and contact with a known case of TB (OR 5.97 [95% CI 2.03,  
186 17.52]) remained significant risk factors for a positive IGRA.

187

188

Confidential

## 189 Discussion

190 We present data from a cohort of children referred for TBMS to a regional TB program  
191 which receives >40% of all childhood TBMS referrals in Ontario. We found that most referrals  
192 were made because of a past history of TB disease, that few of this cohort had evidence of TB  
193 infection or past disease, and that the TBMS referral did not detect active TB in any referred  
194 child.

195 As shown in Table 2, our patients were geographically quite representative of all  
196 pediatric TBMS referrals in Ontario though included more young children and fewer  
197 adolescents. Very few of the 166 patients treated for TB had undergone diagnostic  
198 microbiologic investigations in their country of origin and only one had been culture- positive.  
199 Pediatric TB is often paucibacillary and diagnosis is difficult. Investigations may be expensive  
200 and difficult to access in many countries, but, in contrast over 40% of pediatric TB cases in  
201 North America have positive cultures.<sup>9,10</sup>

202 In contrast to adults referred for TBMS,<sup>5</sup> only 1.4% of referrals for our cohort were due  
203 to radiographic abnormalities. Upon evaluation in Toronto, most children had normal  
204 radiographs and the remainder had minor or questionable changes: evidence of intrathoracic  
205 lymphadenopathy or calcification, the hallmarks of childhood TB,<sup>8</sup> was rare. After review by a  
206 second radiologist using a structured classification,<sup>8</sup> only 4 children were found to have  
207 radiographic abnormalities suggestive of TB. Radiographic abnormalities often persist after  
208 treatment for TB disease in children with only one third of children having normal chest  
209 radiographs at the completion of treatment in a study in Texas.<sup>10</sup> The absence of such  
210 abnormalities is evidence that many in this cohort did not ever have TB disease.

211

1  
2  
3 212  
4  
5 213           Only 15% of those with a past history of TB had a positive IGRA. IGRA test positivity  
6  
7  
8 214 has been shown to persist in 87% of adults at the end of treatment for TB disease in Montreal,  
9  
10 215 Canada,<sup>11</sup> and was found in 70% of patients with a remote history of TB evaluated in a  
11  
12 216 Norwegian TB clinic.<sup>12</sup> In an United States study all QFT-positive health care workers treated  
13  
14 217 for LTBI were QFT-positive at the end of treatment.<sup>13</sup> Persistence of a positive TST has been  
15  
16 218 demonstrated 3-9 years following treatment for latent infection.<sup>14</sup> Given that both the TST and  
17  
18 219 IGRA depend on immunologic memory of TB, it is likely a much greater proportion of IGRAs  
19  
20 220 would remain positive if most children truly had TB infection or disease.

21  
22  
23  
24 221           The most significant predictor of a positive IGRA was known contact with an infectious  
25  
26 222 source case, the most important known predictor of infection.<sup>15</sup> This further validates the IGRA  
27  
28 223 as a useful investigation and emphasizes the importance of taking a detailed contact history as  
29  
30 224 part of the screening process. Increasing age was weakly associated with IGRA positivity, which  
31  
32 225 has also been described elsewhere.<sup>16</sup>

33  
34  
35 226           The majority of our cohort were born in and/or migrated from the Philippines and had  
36  
37 227 been treated for TB. This study suggests that many children are treated without strong evidence  
38  
39 228 of disease. Frequently the IME recorded a diagnosis of “Primary Complex TB”, but no child  
40  
41 229 with that diagnosis had microbiologically proven TB. Yasseen et al. have shown very different  
42  
43 230 rates of TB diagnosis in children immigrating from countries with comparable overall incidence  
44  
45 231 of TB:<sup>6</sup> 2.3% of children from the Philippines had a TB diagnosis as compared with 0.06% of  
46  
47 232 children immigrating from Pakistan. The 2016 TB incidence in these countries was 322/100,000  
48  
49 233 and 270/100,000, respectively.<sup>17</sup> Our study adds clinical detail to these data and confirms that,  
50  
51 234 based on chest radiograph findings and IGRA results, the majority of referred children had no  
52  
53  
54  
55  
56  
57  
58  
59  
60

1  
2  
3 235 evidence of TB. The Canadian IME for children, which involves only a history and physical  
4  
5 236 exam generates most TBMS referrals because of a past history of TB diagnosis. We found that  
6  
7 237 for this cohort, prior TB diagnosis was a poor marker of past TB disease or LTBI, and that the  
8  
9 238 current TBMS process results in burdens to many families and health services without  
10  
11  
12 239 identifying cases.

14 240 Our study identifies in detail several problems with the current TBMS system for  
15  
16  
17 241 children. Firstly, the initial clinical TBMS visit had very limited utility in diagnosing TB. No  
18  
19 242 child was treated for TB disease as a result of our evaluation, and treatment for LTBI, prescribed  
20  
21 243 in 3 cases, resulted from IGRA testing which is currently not part of the IME or TBMS process.  
22  
23 244 Secondly, follow-up visits also failed to identify reactivated or incident cases. Thirdly, TB  
24  
25 245 contact is highly predictive of a positive IGRA highlighting the importance of conducting a  
26  
27 246 detailed history regarding contact with TB during the IME and post-immigration.

28  
29 247 This study has several limitations. It is retrospective, though data was prospectively  
30  
31 248 collected at the time of first visit. Data from the countries of origin were sparse including  
32  
33 249 specific details about why children were treated for TB. Furthermore, most, but not all children  
34  
35 250 underwent IGRA testing at our centre, though this was related to availability of the test. Our  
36  
37 251 patient population was was geographically similar to that of Ontario TBMS referrals but with  
38  
39 252 more young children and fewer adolescents limiting generalisability, our data may also not be  
40  
41 253 generalizable nation-wide due to differing migration patterns in various Canadian provinces.

42  
43 254 We have found that current IME/TBMS system did not identify children with TB disease  
44  
45 255 in this cohort either at first visit or at follow-up. Relying on a past history of treatment as the  
46  
47 256 major driver of TBMS results in over-referral of children from countries with high rates of  
48  
49 257 empiric treatment. Consideration should be given to approaches which may include pre- or post-  
50  
51  
52  
53  
54  
55  
56  
57  
58  
59  
60

1  
2  
3  
4  
5  
6  
7  
8  
9  
10  
11  
12  
13  
14  
15  
16  
17  
18  
19  
20  
21  
22  
23  
24  
25  
26  
27  
28  
29  
30  
31  
32  
33  
34  
35  
36  
37  
38  
39  
40  
41  
42  
43  
44  
45  
46  
47  
48  
49  
50  
51  
52  
53  
54  
55  
56  
57  
58  
59  
60

258 immigration tests of infection with TSTs or IGRAs, especially in populations at high risk for  
259 infection.<sup>16</sup> We believe that a better system needs to be designed and assessed to find a balance  
260 between identifying those at risk for TB, protecting public health, and minimizing undue burden  
261 on children, families, and the health care system.

262

Confidential

1  
2  
3 263 **References**

- 4 264
- 5 265 1. Phypers M. Pediatric tuberculosis in Canada. *Can Commun Dis Rep* 2003;29(16):139-42
- 6
- 7
- 8 266 2. Statistics Canada. 2013. Immigration and Ethnocultural Diversity in Canada: National  
9 267 Household Survey 2011. Statistics Canada Catalogue no. 99-010-X2011001. Ottawa,  
10 268 Ontario. Available from: <http://www12.statcan.gc.ca/nhs-enm/2011/as-sa/99-010-x/99-010-x2011001-eng.cfm> (accessed April 23, 2017).  
11 269
- 12
- 13 270 3. Alvarez GG, Gushulak B, Rumman KA, Altpeter E, Chemtob D, Douglas P, Erkens C,  
14 271 Helbling P, Hamilton I, Jones J, Matteelli A. A comparative examination of tuberculosis  
15 272 immigration medical screening programs from selected countries with high immigration and  
16 273 low tuberculosis incidence rates. *BMC infectious diseases*. 2011 Jan 4;11(1):3.
- 17
- 18
- 19 274 4. Public Health Agency of Canada. 2014. Chapter 13 Tuberculosis Surveillance and Screening  
20 275 in Selected High-Risk Populations: Canadian Tuberculosis Standard 7<sup>th</sup> edition. Public Health  
21 276 Agency of Canada Catalogue no. HP40-18/2014E-PDF. Ottawa, Ontario. Available from:  
22 277 <http://www.phac-aspc.gc.ca/tbpc-latb/pubs/tb-canada-7/assets/pdf/tb-standards-tb-normes-ch13-eng.pdf> (accessed April 23, 2017).  
23 278
- 24
- 25
- 26 279 5. Khan K, Hirji MM, Miniota J, Hu W, Wang J, Gardam M, Rawal S, Ellis E, Chan A,  
27 280 Creatore MI, Rea E. Domestic impact of tuberculosis screening among new immigrants to  
28 281 Ontario, Canada. *Canadian Medical Association Journal*. 2015 Nov 3;187(16):E473-81.
- 29
- 30 282 6. Yasseen III AS, Rea E, Alvarez GG, Hirji MM, Khan K, Kitai I. Tuberculosis among foreign  
31 283 born children and adolescents emigrating to Ontario, Canada. International Union against  
32 284 Tuberculosis and Lung Disease \_NAR meeting, Vancouver, Canada, February 2017
- 33
- 34
- 35 285 7. Yamada S, Caballero J, Matsunaga DS, Agustin G, Magana M. Attitudes regarding  
36 286 tuberculosis in immigrants from the Philippines to the United States. *Fam Med*.  
37 287 1999;31(7):477-82.
- 38
- 39 288 8. Graham SM, Ahmed T, Amanullah F, Browning R, Cardenas V, Casenghi M, Cuevas LE,  
40 289 Gale M, Gie RP, Grzemska M, Handelsman E. Evaluation of tuberculosis diagnostics in  
41 290 children: 1. Proposed clinical case definitions for classification of intrathoracic tuberculosis  
42 291 disease. Consensus from an expert panel. *Journal of Infectious Diseases*. 2012 May  
43 292 15;205(suppl 2):S199-208.
- 44
- 45
- 46 293 9. Thampi N, Stephens D, Rea E, Kitai I. Unexplained deterioration during antituberculous  
47 294 therapy in children and adolescents: clinical presentation and risk factors. *The Pediatric  
48 295 infectious disease journal*. 2012 Feb 1;31(2):129-33.
- 49
- 50 296 10. Al-Dossary FS, Ong LT, Correa AG, Starke JR. Treatment of childhood tuberculosis with a  
51 297 six month directly observed regimen of only two weeks of daily therapy. *The Pediatric  
52 298 infectious disease journal*. 2002 Feb 1;21(2):91-7.
- 53
- 54
- 55
- 56
- 57
- 58
- 59
- 60

- 1  
2  
3 299 11. Denkinger CM, Pai M, Patel M, Menzies D. Gamma interferon release assay for monitoring  
4 300 of treatment response for active tuberculosis: an explosion in the spaghetti factory. *Journal of*  
5 301 *clinical microbiology*. 2013 Feb 1;51(2):607-10.  
6  
7 302 12. Dyrhol-Riise AM, Gran G, Wentzel-Larsen T, Blomberg B, Haanshuus CG, Mørkve O.  
8 303 Diagnosis and follow-up of treatment of latent tuberculosis; the utility of the QuantiFERON-  
9 304 TB Gold In-tube assay in outpatients from a tuberculosis low-endemic country. *BMC*  
10 305 *infectious diseases*. 2010 Mar 8;10(1):57.  
11  
12 306 13. Pollock NR, Kashino SS, Napolitano DR, Sloutsky A, Joshi S, Guillet J, Wong M, Nardell E,  
13 307 Campos-Neto A. Evaluation of the effect of treatment of latent tuberculosis infection on  
14 308 QuantiFERON-TB gold assay results. *Infection Control & Hospital Epidemiology*. 2009 Apr  
15 309 1;30(04):392-5.  
16  
17 310 14. Hsu KH. Tuberculin reaction in children treated with isoniazid. *American Journal of*  
18 311 *Diseases of Children*. 1983 Nov 1;137(11):1090-2.  
19  
20 312 15. Saiman L, San Gabriel P, Schulte J, Vargas MP, Kenyon T, Onorato I. Risk factors for latent  
21 313 tuberculosis infection among children in New York City. *Pediatrics*. 2001 May 1;107(5):999-  
22 314 1003.  
23  
24 315 16. Lowenthal P, Barry PM, Flood J. High Discordance Between Pre-US and Post-US Entry  
25 316 Tuberculosis Test Results Among Immigrant Children: Is it Time to Adopt Interferon  
26 317 Gamma Release Assay for Preentry Tuberculosis Screening?. *The Pediatric infectious*  
27 318 *disease journal*. 2016 Mar 1;35(3):231-6.  
28  
29 319 17. Tuberculosis country profiles [Internet]. World Health Organization. 2017 [cited 16 August  
30 320 2017]. Available from: <http://www.who.int/tb/country/data/profiles/en/>  
31  
32  
33  
34  
35  
36  
37  
38  
39  
40  
41  
42  
43  
44  
45  
46  
47  
48  
49  
50  
51  
52  
53  
54  
55  
56  
57  
58  
59  
60



**Table 1. Characteristics of Immigrant and Refugee Children Referred to SickKids for TB Medical Surveillance, Toronto, November 2012 - June 2016**

| Characteristic                                                          | No IGRA done (n=40) | IGRA neg. (n=152) | IGRA pos. (n=24) | Total (n=216) |
|-------------------------------------------------------------------------|---------------------|-------------------|------------------|---------------|
| Sex                                                                     |                     |                   |                  |               |
| Male                                                                    | 18 (45%)            | 66 (43%)          | 14 (58%)         | 118 (55%)     |
| Female                                                                  | 22 (55%)            | 86 (57%)          | 10 (42%)         | 98 (45%)      |
| Age (yr)                                                                |                     |                   |                  |               |
| <5                                                                      | 2 (5%)              | 21 (14%)          | 0 (0%)           | 23 (11%)      |
| 6-10                                                                    | 24 (60%)            | 70 (46%)          | 10 (42%)         | 104 (48%)     |
| 11-16                                                                   | 14 (35%)            | 61 (40%)          | 14 (58%)         | 89 (41%)      |
| Country of birth                                                        |                     |                   |                  |               |
| Philippines                                                             | 32 (80%)            | 108 (71%)         | 17 (71%)         | 157 (73%)     |
| India*                                                                  | 3 (7.5%)            | 32 (21%)          | 4 (17%)          | 39 (18%)      |
| Israel**                                                                | 2 (5%)              | 3 (2%)            | 0 (0%)           | 5 (2%)        |
| Saudi Arabia**                                                          | 0 (0%)              | 2 (1%)            | 1 (4%)           | 3 (1%)        |
| Russia                                                                  | 0 (0%)              | 2 (1%)            | 0 (0%)           | 2 (1%)        |
| Nepal                                                                   | 0 (0%)              | 2 (1%)            | 0 (0%)           | 2 (1%)        |
| Other***                                                                | 3 (7.5%)            | 3 (2%)            | 2 (8%)           | 8 (4%)        |
| Medical surveillance referral reason                                    |                     |                   |                  |               |
| Past history of prior treatment for TB                                  | 36 (90%)            | 110 (72%)         | 20 (83%)         | 166 (77%)     |
| Automatic referral refugee resettlement program                         | 0 (0%)              | 31 (20%)          | 3 (13%)          | 34 (16%)      |
| Possible TB contact                                                     | 1 (2.5%)            | 3 (2%)            | 0 (0%)           | 4 (2%)        |
| Positive TST on immigration                                             | 2 (5%)              | 3 (2%)            | 1 (4%)           | 5 (2%)        |
| Abnormal CXR on immigration                                             | 0 (0%)              | 3 (2%)            | 0 (0%)           | 3 (1%)        |
| Other                                                                   | 1 (2.5%)            | 2 (1%)            | 0 (0%)           | 2 (1%)        |
| Prior diagnosis                                                         |                     |                   |                  |               |
| Primary complex TB                                                      | 31 (78%)            | 101 (66%)         | 18 (75%)         | 150 (69%)     |
| TB disease (site specific)                                              | 4 (10%)             | 6 (4%)            | 1 (4%)           | 11 (5%)       |
| -Pulmonary TB                                                           | 2 (5%)              | 6 (4%)            | 1 (4%)           | 9 (4%)        |
| -Lymph Node TB                                                          | 2 (5%)              | 0 (0%)            | 0 (0%)           | 2 (1%)        |
| Latent TB infection                                                     | 1 (2.5%)            | 2 (1%)            | 1 (4%)           | 4 (2%)        |
| No prior diagnosis                                                      | 0 (0%)              | 37 (20%)          | 3 (12.5%)        | 40 (19%)      |
| Prior symptoms in country of origin that led to diagnosis of TB disease |                     |                   |                  |               |
| None                                                                    | 13 (33%)            | 56 (37%)          | 9 (37.5%)        | 78 (36%)      |
| Unknown                                                                 | 8 (20%)             | 30 (20%)          | 7 (29%)          | 45 (21%)      |
| Known*                                                                  | 19 (48%)            | 66 (43%)          | 8 (33%)          | 93 (43%)      |
| -Cough                                                                  | 17                  | 57                | 6                | 80            |
| -Fever/ headache                                                        | 9                   | 25                | 2                | 36            |
| -Weight loss/ poor appetite                                             | 2                   | 17                | 2                | 21            |
| -Lymphadenopathy                                                        | 3                   | 5                 | 1                | 9             |
| -Cold- or flu-like symptoms                                             | 1                   | 6                 | 2                | 9             |
| -Abdominal pain                                                         | 1                   | 0                 | 0                | 1             |
| -Vomiting                                                               | 1                   | 0                 | 0                | 1             |
| -Diarrhea                                                               | 1                   | 0                 | 0                | 1             |

\*Percentages do not always add up to 100 due to rounding error

**Table 2: Comparison between the country of birth and age of immigration of all TBMS referred children in Ontario and those referred to SickKids between November 2012 and June 2016.**

|                                               | Ontario<br>(n=508) | SickKids<br>(n=216) | p value |
|-----------------------------------------------|--------------------|---------------------|---------|
| Country of birth                              |                    |                     |         |
| Philippines                                   | 393 (77.4%)        | 157 (72.7%)         | 0.76    |
| India                                         | 55 (10.8%)         | 29 (13.4%)          | 0.37    |
| China                                         | 8 (1.6%)           | 0 (0.0%)            | 0.11    |
| Saudi Arabia                                  | 6 (1.2%)           | 3 (1.4%)            | 0.53    |
| Nepal                                         | 4 (0.8%)           | 2 (0.9%)            | 0.58    |
| Other                                         | 42 (8.3%)          | 25 (11.6%)          | 0.16    |
| Age at immigration/ age at first clinic visit |                    |                     |         |
| 0-4                                           | 20 (3.9%)          | 13 (6%)             | 0.24    |
| 5-10                                          | 149 (29.3%)        | 114 (52.8%)         | <.0001  |
| 11-17                                         | 339 (66.7%)        | 89 (41.2%)          | <.0001  |

**Table 3. Predictors of a positive IGRA (Quantiferon-Gold (QFT®))**

| Characteristic             | Quantiferon result |     | Univariate Analysis |         | Multiple Logistic Regression |         |
|----------------------------|--------------------|-----|---------------------|---------|------------------------------|---------|
|                            | NEG                | POS | OR (95%CI)          | p value | OR (95%CI)                   | p value |
| Age at first visit (years) |                    |     |                     |         |                              |         |
| ≤10                        | 91                 | 10  | Reference           |         |                              |         |
| 11 to 17                   | 61                 | 14  | 0.48 (0.20, 1.15)   | 0.1203  |                              |         |
| Continuous (Older)         |                    |     |                     |         | 2.98 (1.24, 8.30)            | 0.024   |
| Age at treatment (years)   |                    |     |                     |         |                              |         |
| ≤4                         | 76                 | 9   | 2.81 (1.07, 7.43)   | 0.0412  |                              |         |
| 5 to 16                    | 33                 | 11  | Reference           |         |                              |         |
| Known TB contact           |                    |     |                     |         |                              |         |
| NO                         | 138                | 16  | Reference           |         | Reference                    |         |
| YES                        | 14                 | 8   | 4.93 (1.79, 13.55)  | 0.0034  | 5.97 (2.06, 17.52)           | 0.001   |
| Abnormal chest X-ray**     |                    |     |                     |         |                              |         |
| NO                         | 132                | 20  | Reference           |         |                              |         |
| YES                        | 20                 | 4   | 0.76 (0.23, 2.45)   | 0.7479  |                              |         |
| Prior treatment            |                    |     |                     |         |                              |         |
| NO                         | 42                 | 4   | Reference           |         |                              |         |
| YES                        | 110                | 20  | 1.91 (0.61, 5.91)   | 0.3234  |                              |         |
| Total**                    | 152                | 24  |                     |         |                              |         |

\* On second review

\*\* Only 176 children underwent IGRA testing.

POS = Positive; NEG = negative OR = Odds ratio

**Table 4: Findings on initial SickKids radiographs**

|                                   | n  | IGRA + (%) |
|-----------------------------------|----|------------|
| <b>Any abnormality</b>            | 53 | 4 (8%)     |
| <b>Abnormal on second review:</b> | 31 | 4 (13%)    |
| Suggestive of TB*                 |    |            |
| Intrathoracic Lymphadenopathy     | 3  | 1 (25%)    |
| Parenchymal disease               | 1  | 0 (0%)     |
| Questionable abnormalities        |    |            |
| Peribronchial thickening          | 13 | 1 (8%)     |
| Nodule/vessel                     | 6  | 1 (17%)    |
| Atelectasis                       | 4  | 0 (0%)     |
| Other**                           | 4  | 1 (25%)    |

\* Using criteria of Graham et al. (2012)

\*\* Other includes: possible pleural thickening (2), question of calcified nodule (1), possible lucencies (1)

**Appendix 1: Chest radiographic information from the Immigration Medical Exam (IME) in children who were treated for TB**

| Available information    | All treated patients<br>(n=138) | CXR at time of diagnosis<br>(n=67) |
|--------------------------|---------------------------------|------------------------------------|
| “Abnormal”               | 51 (37.0%)                      | 38 (56.7%)                         |
| Hilar changes            | 14 (10.1%)                      | 12 (17.9%)                         |
| “Primary complex/ Kochs” | 13 (9.4%)                       | 6 (9.0%)                           |
| Normal                   | 52 (37.7%)                      | 11 (16.4%)                         |
| Peribronchial thickening | 1 (0.7%)                        |                                    |
| Parenchymal/Pneumonia    | 4 (2.9%)                        |                                    |
| Other                    | 3 (2.2%)                        |                                    |

\*Other: cyst, blunting of angles

Confidential

**Appendix 2: Results of review by SickKids radiologist of available chest radiographs taken from the country of origin**

| Outside Films                            | n=27       |
|------------------------------------------|------------|
| Poor quality                             | 4 (14.8%)  |
| Normal: 2 views                          | 11 (40.7%) |
| Normal: single view                      | 1 (3.7%)   |
| Nonspecific lower airway inflammation    | 7 (25.9%)  |
| Airspace disease without lymphadenopathy | 2 (7.4%)   |
| Possible bronchiectasis                  | 1 (3.7%)   |
| Intrathoracic lymphadenopathy            | 1 (3.7%)   |
| Total                                    | 27         |

\*Median interval from outside chest radiograph and SickKids chest radiograph was 0.91 years.

Confidential
